# Supplementary material for: The association of plasma osteoprotegerin levels and functional outcomes post endovascular thrombectomy in acute ischemic stroke patients: a retrospective observational study
Source: PeerJ. 2022 May 3;10:e13327. doi: 10.7717/peerj.13327 (PMC9074858; doi:10.7717/peerj.13327)
Supplement: Supplemental Information 7 — All risk factors analyzed for confirming relationship plasma osteoprotegerin levels and function outcome in stroke patients received endovascular thrombectomy. [file peerj-10-13327-s007.xlsx]

## Sheet: data
VAR__sex	VAR__age	VAR__bmi	VAR__htn_cal	VAR__dm_cal	VAR__hichol_cal	VAR__coronary	VAR__CHF_all	VAR__A_fib_cal	VAR__smoking_cur	alcohol	prestroke1	Any_pre_antiplatelet	Any_pre_anticoagulation	VAR__pre_statin	NIHSS	VAR__tl_TPA_1yes_0no	onset_to_puncture	Numberthrombectomy	Recan_good_2b_3__1bad_0	hemo_transform_type	anyhemorrhagictransformation	TOAST	OPGlevel	vitD	VAR__glucose_initial_cal	VAR__tg	VAR__tchol	VAR__ldl	VAR__wbc_cal	VAR__hgb_cal	VAR__ysr_creatine	totalcalcium	labphosphorus	CRP	mrsdichoto
1	38	18.3333	0	0	0	0	0	1	0	0	0	0	0	0	13	1	93	2	1	0	0	CE	265.68	29.88	112	58	141	76	4.36	12.6	0.74	8.6	2.5	0.31	1
0	90	11.6667	1	1	1	0	0	1	0	0	0	1	0	1	17	1	130	1	1	0	0	CE	246.53	32.8	123	67	121	63	7.09	13.8	0.89	8.1	2	9.48	1
0	56	17.6667	0	0	1	0	0	0	0	0	0	0	0	0	20	0	460	2	1	1	1	UN	171.93	16.36	103	89	237	172	6.46	12.4	0.57	8	2.6	0.61	1
0	77	23.3333	1	0	0	0	0	0	1	0	1	0	0	0	2	0	788	2	1	0	0	LAA	363.77	29.21	143	60	126	89	5.46	10.6	0.98	8.3	3.1	0.04	0
0	96	15.6667	1	1	1	0	1	1	0	0	0	1	0	1	23	0	140	4	1	0	0	UT	281.95	15	147	144	203	146	7.05	13.4	0.53	8.8	3.6	0.81	1
0	88	20	1	1	1	1	0	0	0	1	1	1	0	1	10	0	300	1	1	0	0	CE	238.91	14.24	173	132	108	49	5.42	11.9	0.74	8.4	2.9	0.2	1
1	69	20	1	0	0	0	0	0	0	0	0	0	0	0	2	0	1116	1	1	0	0	UN	56.4	26.88	139	88	140	88	7.82	15	0.82	8.2	3.3	0.84	0
0	81	17	1	0	0	0	0	0	1	0	0	0	0	0	3	0	348	2	1	0	0	UT	95.33	21.92	95	81	199	141	9.03	14.5	0.69	7.4	3.7	0.14	0
0	87	13.3333	0	0	1	0	0	1	0	0	0	0	1	1	20	0	883	1	1	1	1	CE	265.68	16.08	126	86	154	97	10.18	13.2	0.84	8.4	2.7	0.11	1
1	86	20.3333	1	1	0	0	0	1	0	0	0	0	0	0	19	0	398	0	1	3	1	CE	287.63	16.68	174	54	113	64	6.57	13.3	0.8	7.8	2.7	1.03	1
0	87	11.6667	1	1	1	1	0	0	0	1	1	0	1	1	22	0	138	6	1	0	0	CE	216.45	29.36	153	146	149	67	8.64	11.5	1.36	8.1	2.7	0.8	1
0	82	25	1	1	1	0	0	1	0	0	1	0	0	1	12	0	402	1	1	0	0	CE	166.01	21.98	130	201	132	55	6.52	14.5	1.46	8.2	3	0.13	0
1	71	23.6667	1	1	0	0	0	0	0	0	0	0	0	0	7	0	443	0	1	0	0	LAA	86.4	26.88	149	129	165	110	11.42	12.4	0.83	8	4.6	0.1	0
1	66	19.3333	1	1	1	0	0	0	1	0	0	0	0	0	15	0	595	1	1	4	1	UN	273.03	21.73	152	222	178	109	10.99	15	0.77	8	3.6	0.22	1
0	35	22.3333	0	0	0	0	0	0	0	0	0	0	0	0	12	0	620	1	1	0	0	CE	239.35	12.52	125	55	135	62	10.08	11.9	0.68	8.8	3.2	0.49	0
1	68	23.3333	1	1	0	0	0	0	0	0	1	0	0	0	21	1	267	3	1	0	0	LAA	196.33	21.68	160	72	104	50	6.18	10.1	0.67	8.6	3.7	0.27	1
1	57	19.6667	0	0	0	0	0	1	0	0	0	0	0	0	2	0	1958	2	1	4	1	CE	129.47	23.48	134	117	168	88	6.93	15.2	1.11	8.5	2.7	1.27	1
0	26	21	0	0	0	0	0	0	0	1	0	0	0	0	17	0	287	1	1	0	0	CE	254.27	19.64	104	61	199	138	12.06	12.3	0.48	8.8	3.3	1.07	0
1	79	24.6667	1	1	1	0	0	0	0	0	0	0	0	1	11	1	143	1	1	0	0	UN	285.47	29.28	307	149	154	71	5.56	13.5	1.65	8	2.5	0.4	1
0	56	20	1	1	0	0	0	1	0	0	0	0	1	0	4	1	142	2	1	0	0	CE	241.21	23.64	129	159	193	130	8.17	13.1	0.79	8	3.2	0.9	0
0	67	21.6667	0	1	1	0	0	0	0	0	0	0	0	0	21	0	402	4	0	0	0	UN	110.72	14.04	292	228	278	170	17.32	17.3	0.68	8.4	3.2	0.91	0
1	83	14	0	1	0	0	0	1	0	0	0	0	0	0	14	0	405	6	1	1	1	CE	45.12	16.76	123	94	124	65	7.7	14.4	0.84	8.2	3.4	0.3	0
1	77	21	1	1	1	0	0	0	0	0	0	0	0	1	10	1	170	1	1	0	0	LAA	79.35	12.52	421	142	135	61.6	6.24	14.8	0.96	8.4	3.8	0.5	0
1	67	26	0	0	0	0	0	0	0	0	0	0	0	0	5	0	907	2	1	0	0	UN	163.77	29.21	108	78	168	122	7.06	14.7	0.82	8.2	3	0.34	0
1	84	23	1	0	0	1	0	0	0	0	0	0	0	0	15	0	442	1	1	4	1	LAA	241.28	12.96	126	99	236	151	10.9	16	0.61	7.8	3.3	0.1	1
0	85	16.6667	1	0	1	1	0	1	0	1	1	1	0	1	25	0	136	0	1	0	0	CE	216.69	18.72	150	99	178	121	8.12	12.2	0.61	8.1	2.9	1.1	1
1	79	25	0	1	1	0	0	1	0	0	0	0	0	0	9	0	1777	1	1	0	0	CE	156.4	26.88	145	287	218	131	6.59	15.2	0.87	8.1	3.2	0.03	0
1	69	22	0	1	0	0	0	1	1	0	0	0	0	0	19	0	360	3	1	4	1	UT	258.25	13.68	174	75	204	133	5.96	15.1	1.13	8.3	3	1.07	1
0	69	13	1	0	0	0	0	0	0	0	0	1	0	0	19	0	337	1	0	4	1	UN	319.94	31.48	165	263	210	153	11.56	13.1	0.5	8.2	3.8	1.3	1
1	79	24	1	0	1	0	0	0	0	1	0	0	1	1	15	1	233	1	1	0	0	CE	163.77	29.21	87	96	148	68	6.88	12.4	1.44	7.9	3.5	0.78	0
0	73	21.6667	1	1	0	0	0	1	0	0	0	1	0	0	14	0	384	3	1	4	1	CE	168.53	15.28	140	98	159	103	9.22	13.4	0.83	8.3	3.7	0.25	0
0	55	21.6667	1	0	1	0	0	0	0	0	0	0	1	1	12	0	555	3	1	0	0	CE	217.99	30.77	93	84	125	58	7.25	12.8	0.55	8.3	3.4	0.34	0
0	56	24.3333	0	1	0	0	0	0	0	0	0	0	0	0	22	0	700	1	1	0	0	UN	123.9	28.44	172	78	150	100	9.66	13.2	0.7	7.8	3.8	0.1	1
1	94	16.6667	1	1	0	0	0	0	0	1	0	0	0	0	17	0	190	0	0	4	1	LAA	186.56	22.36	106	80	162	106	7.9	12.1	1	8.4	2.8	0.11	1
1	77	22.6667	1	1	1	0	0	0	0	0	0	0	0	1	7	1	111	1	1	0	0	LAA	165.05	31.92	125	101	126	70	9.3	15.8	1.19	9.1	3.6	0.12	0
1	80	18.3333	1	0	0	0	0	0	0	0	0	0	0	0	5	0	389	0	1	0	0	LAA	387.46	20.72	123	153	140	88	7.97	9.9	2.43	8.1	2.6	0.65	0
0	81	17	1	0	1	0	0	0	0	0	0	0	0	1	5	1	316	2	1	0	0	CE	243.85	14.28	102	80	115	58	8.12	13.3	0.94	8.1	3.3	0.92	0
0	82	18.3333	1	1	1	0	0	1	0	0	0	1	0	1	21	0	647	1	1	0	0	UT	178.52	12.96	127	68	87	50	3.5	6.9	1.42	8.3	3.8	0.18	1
0	85	15.6667	1	0	1	0	0	0	0	0	1	1	0	1	8	0	1587	1	1	0	0	LAA	333.51	19.52	107	103	152	37	4.46	11.5	0.72	8	3.1	0.04	0
0	77	19.3333	1	0	0	0	0	1	0	0	1	0	1	0	18	1	188	5	1	0	0	CE	125.23	22.84	98	82	139	81	3.98	11.9	0.7	8.6	3.2	0.5	0
1	81	25	1	1	1	0	0	0	0	0	0	1	0	1	7	1	160	1	1	0	0	UN	136.44	33.08	358	77	125	70	6.44	12.7	0.94	8.5	3.1	0.34	0
1	85	23.3333	1	1	0	0	0	0	0	0	1	0	0	0	15	0	206	2	1	0	0	CE	187.76	16.64	215	53	111	68	6.63	10.7	1.18	8.1	2.7	0.06	0
0	84	25.6667	1	0	1	1	0	1	0	1	1	1	0	1	7	0	590	0	1	0	0	CE	177.16	28.16	174	98	102	57	14	10.4	0.76	8.2	3.3	0.24	1
1	76	21.3333	1	0	1	1	0	1	0	1	0	0	1	1	13	0	675	1	1	0	0	CE	207.32	12.44	109	159	141	81	6.35	13.8	1.26	8.1	3	0.8	0
1	89	22.6667	1	1	0	0	1	1	0	0	1	0	0	0	13	0	595	3	1	0	0	CE	161.45	17.92	120	70	121	60	4.5	8.9	1.06	8	2.4	0.1	1
1	93	24.6667	1	1	0	0	0	0	0	0	0	1	0	0	13	0	146	3	1	0	0	UN	279.55	27.6	135	71	154	77	6.42	12.6	1.36	8	3.7	0.04	0
0	36	13.3333	0	0	0	0	0	0	0	0	0	0	1	0	15	1	1125	1	1	1	1	CE	185.91	15.48	141	71	217	153	5.33	13.5	0.54	8.9	3	0.03	0
1	63	22.6667	1	1	0	0	0	0	0	0	0	0	0	0	15	1	94	2	1	0	0	LAA	179.32	26.72	222	109	152	110	11.08	14.7	0.84	8.5	2.8	0.03	0
1	76	23.3333	0	1	1	0	0	1	0	0	0	0	1	1	7	0	100	1	1	0	0	CE	266.01	23.98	255	112	118	80	7.3	10.4	0.82	8.2	3.1	0.46	0
1	73	25	0	1	0	0	0	0	1	0	0	0	0	0	10	0	720	2	1	1	1	UN	145.23	22.84	132	163	161	105	6.98	15.6	0.84	8.9	3.3	2.4	0
1	68	28	1	0	0	0	0	0	1	1	0	0	0	0	18	1	69	2	1	0	0	UN	86.35	27.6	89	131	155	89	6.96	14.5	0.64	8.1	2.9	0.2	0
1	62	20	0	1	0	0	0	0	0	0	0	0	0	0	22	0	380	3	1	0	0	UN	172.09	11.16	142	93	92	47	5.14	9.3	0.67	8.1	3	0.24	0
0	60	16.3333	1	1	0	0	0	1	0	0	0	1	1	0	19	1	150	7	0	0	0	UT	167.22	15.68	343	182	200	124	5.37	15	0.8	8.1	2.7	0.4	1
0	47	16.6667	0	1	0	0	0	0	0	0	0	0	0	0	13	0	139	7	0	0	0	CE	206.78	26.76	127	126	183	152	2.59	8	0.28	8.2	2.8	1.8	1
0	83	15	1	1	1	0	0	1	0	0	1	1	0	1	8	0	677	3	1	0	0	UN	175.41	28.92	115	80	83	32	5.05	12.5	0.55	8.3	4.1	0.18	1
0	94	16	1	1	1	0	0	0	0	0	0	1	0	1	26	0	209	2	0	0	0	LAA	207.96	11.56	92	79	119	46	8.09	10.8	1.1	7.8	3.1	0.13	1
1	84	20.3333	1	1	1	0	0	0	0	0	1	1	0	1	7	0	415	1	1	0	0	SOD	164.87	18.16	149	57	212	142	5.54	13.2	0.97	7.7	3	0.08	0
1	75	18.6667	1	0	1	0	0	1	1	0	1	0	1	0	19	1	185	1	1	0	0	UT	216.38	16.96	92	64	174	102	6.22	14.3	0.76	8.2	3	0.06	0
1	83	25	1	0	0	0	0	1	0	1	0	0	0	0	19	1	228	1	1	0	0	CE	65.05	30.92	113	82	154	85	7.75	14.4	0.8	8	3.4	0.2	0
0	82	18.3333	1	0	0	1	0	1	0	0	0	1	0	0	12	1	287	4	1	0	0	UT	290.71	14.28	106	40	171	81	3.2	12.2	0.81	8.6	2.5	0.18	0
1	74	24	0	0	0	0	0	1	0	0	1	1	1	0	8	1	117	0	1	0	0	UN	141.21	23.64	101	60	173	93	3.93	12.8	0.52	8.9	3.3	0.05	0
1	82	23.3333	0	1	1	0	0	1	0	0	1	0	1	1	12	0	1190	1	1	0	0	CE	122.6	11.84	112	118	200	136	4.25	12.7	1.12	8.2	2.2	0.21	1
0	83	13.6667	1	0	0	0	0	0	0	0	0	1	0	0	2	0	138	1	1	0	0	SOD	266.01	21.98	98	174	136	75	6.45	13.7	0.71	8	3.6	1.3	0
1	87	15	1	1	0	0	1	1	0	0	0	0	0	0	14	0	1171	2	1	1	1	CE	179.53	18.28	109	121	153	108	12.4	13.5	0.74	8.3	3.7	0.22	1
0	76	18.6667	1	0	1	0	0	1	0	0	0	0	1	0	17	1	122	3	1	1	1	CE	260.43	31.52	156	119	176	124	7.92	9.5	0.64	8.5	2.9	0.3	1
1	53	22	0	0	0	0	0	0	1	0	0	0	0	0	0	0	230	2	1	0	0	LAA	98.65	25.16	121	85	148	92	9.22	14.8	0.83	8.8	3	0.07	0
0	83	18	0	1	0	0	0	1	0	0	1	0	1	0	17	0	125	0	0	0	0	CE	238.19	12.32	203	98	128	72	7.02	12.8	0.95	8	2.4	0.04	1
1	86	26	1	1	1	1	0	0	0	0	0	1	0	1	10	0	415	1	1	0	0	UT	223.74	29.32	123	127	135	75	11.05	16.8	1.58	8.4	3.6	0.6	0
0	85	11.3333	1	0	1	1	0	1	0	1	1	0	0	1	10	0	216	0	0	4	1	UT	140.27	27.16	176	250	148	140	7.14	10.5	0.53	8.2	3.2	1.2	1
1	59	22	1	1	1	1	0	0	0	1	1	1	0	1	13	0	241	1	1	1	1	LAA	138.53	19.96	174	123	117	47	16.41	12	1.08	8	3	1.02	0
0	84	19.6667	1	0	1	1	0	0	0	0	1	1	1	1	13	0	81	1	1	0	0	UT	171.45	14	146	69	113	57	10.79	12.1	0.55	9.6	2.6	0.18	0
1	74	16.3333	1	0	1	1	1	0	0	1	0	1	0	1	16	1	214	1	1	0	0	CE	366.47	18.04	84	256	210	160	4.91	11.8	0.37	7.8	2.5	1.1	1
0	78	16.6667	0	0	0	0	0	0	0	0	0	0	0	0	10	1	175	1	1	0	0	UN	291.73	26	107	135	134	62	8.63	11.8	1.5	8.3	3.1	0.4	0
1	88	21	1	1	0	0	0	1	0	0	0	0	0	0	20	0	89	1	1	0	0	CE	268.65	14.16	144	129	133	83	7.72	13	0.84	8.1	2.8	0.1	1
0	78	20	0	0	0	0	0	1	0	0	0	1	0	0	20	0	1280	2	0	3	1	CE	267.96	19.24	103	122	153	92	3.49	13.4	0.65	8.2	3	0.08	1
1	92	18.3333	0	1	0	0	0	1	1	0	1	0	0	0	20	0	250	2	1	3	1	CE	166.01	16.72	113	105	162	93	4.9	14.4	0.83	8.7	3.5	0.06	1
1	55	19.6667	0	1	0	0	0	0	1	1	0	0	0	0	11	1	104	1	1	4	1	UT	296.41	11.64	153	42	123	80	12.23	11.9	0.68	8.6	3.6	1.82	1
1	52	22.6667	0	0	0	1	0	1	1	0	0	0	1	0	20	0	105	0	1	1	1	CE	247.85	18.96	150	94	199	141	11.76	15.8	0.99	8.5	3.6	0.4	1
1	52	22	0	1	1	1	0	1	0	0	0	0	0	0	4	1	133	2	0	4	1	CE	166.18	16.44	127	113	255	171	9.12	18.7	0.83	7.2	3.7	0.17	1
0	82	20	0	0	1	0	0	1	0	0	0	0	0	0	2	0	850	1	1	2	1	CE	267.61	14.44	121	121	226	167	5.29	13.3	1.03	8	3.4	0.74	0
1	73	21	0	0	0	1	0	1	0	0	0	0	0	0	8	0	130	1	1	0	0	CE	180.55	14.4	98	131	238	149	4.86	14.7	0.91	8.7	3.6	2.6	0
0	46	28.6667	1	1	1	0	0	0	0	0	1	1	0	1	5	0	351	1	0	0	0	LAA	236.44	33.08	153	123	114	64	17.34	15.2	0.9	8.2	2.5	1.32	0
0	90	20.6667	1	1	0	0	0	1	0	0	1	0	1	0	0	0	1255	2	1	0	0	CE	271.45	11.6	117	159	173	108	9.33	11.9	1.11	8	2.7	0.5	0
0	87	20	1	0	0	0	0	0	0	0	0	1	0	0	16	1	92	3	1	0	0	UN	162.21	27.04	128	61	151	89	6.1	13.2	0.78	8.3	3.4	0.81	0
1	63	16.6667	1	0	0	0	0	1	0	0	1	1	0	0	13	1	92	3	1	0	0	CE	216.22	13.52	145	87	145	70	5.11	12.6	0.51	8.2	3.6	0.16	0
1	75	21.6667	1	0	1	0	0	0	0	1	0	0	0	0	0	1	208	0	1	0	0	UN	286.22	13.52	104	209	140	80	7.17	13.9	2	7.8	3	2.6	0
0	53	26	1	0	0	0	0	0	0	0	1	0	0	0	5	1	159	2	1	2	1	SOD	127.64	9.12	120	106	165	111	9.19	15.9	0.81	8.1	2.7	8.54	0
1	78	24.6667	0	1	0	1	0	1	1	1	0	0	1	0	21	1	160	2	1	4	1	CE	127.95	23.08	176	122	195	134	7.32	13.9	0.51	8.7	3.9	0.25	1
1	82	24.3333	1	1	0	0	0	0	0	0	1	0	0	0	23	0	590	2	1	4	1	UN	217.99	13.7	127	247	187	112	13.5	13.6	1.65	7.8	2.2	0.1	0
1	79	23.6667	1	0	0	0	0	1	0	0	1	0	1	0	19	0	305	1	1	0	0	CE	300.18	10.48	106	65	158	93	8.14	14.6	0.75	7	2.6	0.31	0
0	89	17.6667	1	1	1	0	0	0	0	0	0	0	0	0	12	1	305	1	0	0	0	LAA	272.01	26.48	216	88	249	185	10.42	11.5	1.12	8.7	3.7	0.22	1
0	75	16.3333	0	1	0	0	0	1	0	0	0	0	1	0	17	1	255	1	1	2	1	CE	230.21	13.72	122	61	158	71	7.43	11.9	1.24	8.3	3.1	0.07	0
1	70	28.3333	1	1	0	0	0	0	0	0	1	1	0	0	15	0	250	1	1	0	0	CE	195.95	33.04	143	59	123	78	8.6	13.3	0.78	7.8	2.2	0.32	0
1	47	28.3333	0	0	0	0	0	0	1	0	0	0	0	0	16	0	487	1	1	0	0	LAA	241.15	29.28	117	103	198	94	9.32	16	0.8	8.2	2.7	1.06	0
0	85	18.3333	1	1	1	0	0	1	0	0	0	0	0	1	20	0	1300	1	1	0	0	CE	188.78	30.04	113	98	110	45	7.35	11.2	0.8	7.8	5	0.42	0
1	79	21	1	1	0	1	0	1	0	1	0	1	0	0	8	0	375	3	1	3	1	UT	99.81	11.36	125	52	145	92	6.75	13.4	0.65	8.2	2.8	0.6	0
1	72	17	1	1	1	0	0	0	0	0	0	0	0	1	31	0	250	1	1	2	1	UN	264.63	17.32	133	33	133	63	9.05	13.7	0.51	7.8	3	0.13	1
0	89	17.6667	1	1	0	0	0	1	0	0	0	0	0	0	17	0	734	0	1	0	0	SOD	231.27	13.2	144	93	204	112	12.21	12	0.65	8.1	2.3	0.36	1
0	71	17.3333	1	0	0	0	0	0	0	0	0	0	0	0	13	1	241	0	1	0	0	UT	217.41	26.8	190	125	166	83	4.16	12.4	0.7	8.1	3.8	0.5	0
1	77	21.3333	1	1	1	0	0	1	0	0	0	1	0	0	14	0	128	5	0	0	0	CE	287.22	13.6	117	143	124	119	9.59	10.3	0.93	8.1	2.7	0.2	1
1	77	21	1	0	0	0	0	1	0	0	1	0	0	0	12	0	578	2	1	0	0	CE	271.34	22.78	103	85	145	66	7.45	16.2	1.07	8.1	2.9	2.34	0
1	90	14.6667	1	1	1	1	0	1	0	1	1	1	1	1	11	0	580	4	1	3	1	CE	181.71	20	104	365	181	47	5.45	13.8	1	8.3	3.1	0.23	1
0	71	26.3333	1	1	1	0	0	1	0	0	0	1	1	0	11	0	166	0	1	0	0	CE	208.92	15.52	144	429	277	164	6.05	9.2	1.3	8.8	3.6	0.1	0
0	88	17.3333	1	0	1	0	0	1	0	0	0	1	0	0	15	1	140	1	1	1	1	CE	176.51	23.52	107	76	139	73	6.92	13.8	0.53	7.9	2.3	1.13	1
1	84	17.6667	1	0	1	0	0	0	0	0	0	0	0	1	15	0	546	4	1	0	0	LAA	174.64	13.16	164	91	185	96	7.62	14.4	1.2	8.3	3	0.24	0
0	75	19.3333	1	1	1	0	0	1	0	0	0	1	0	0	13	1	150	2	1	1	1	CE	226.39	18.32	182	95	151	86	8.81	13.9	0.64	8	3.1	0.06	0
0	78	17.3333	1	0	0	0	0	0	0	0	0	0	0	0	7	1	143	1	1	1	1	LAA	195.33	21.92	150	159	201	108	8.51	15.3	0.53	7.8	2.2	2.42	0
0	86	16	1	0	0	0	0	1	0	0	0	0	1	0	14	1	54	1	1	0	0	CE	236.91	22.28	118	85	168	82	4.94	13.3	0.72	8	3.1	0.04	0
1	59	19.4667	1	1	1	0	0	0	0	0	0	0	0	0	1	0	1430	1	1	0	0	UN	158.15	13.45	158	276	339	212	6.94	14.8	0.48	8	3.3	0.21	1
1	84	24	1	1	1	0	0	1	0	0	0	0	1	1	11	0	568	1	1	2	1	UT	137.52	17.12	162	106	114	85	10.88	15.7	0.89	8.8	3.6	0.32	1
1	41	26.6667	1	1	0	0	0	0	1	0	0	0	0	0	6	0	707	2	1	0	0	UN	286.41	31.24	127	229	141	74	13.55	12.5	3.03	8.1	3	0.4	0
1	83	25	1	0	0	0	0	1	0	0	1	0	1	0	9	0	1502	1	1	0	0	CE	93.31	17.68	98	74	164	100	3.74	14.1	0.83	8.7	3.4	0.11	0
1	77	20	1	0	0	0	0	0	1	1	0	0	1	0	19	0	505	1	1	0	0	LAA	166.01	30.24	136	82	191	130	9.75	15.1	0.92	8.2	3.3	0.2	0
1	74	23.3333	1	0	1	0	0	0	0	0	1	1	0	1	6	0	922	1	1	3	1	LAA	189.43	11.44	132	60	129	21	6.02	15.4	0.91	8.1	3.2	1.95	0
0	72	18.3333	1	0	0	0	0	1	0	0	0	0	0	0	16	1	84	3	1	2	1	CE	363.77	29.21	101	130	168	119	4.35	13.3	0.66	8.6	2.5	1.5	0
0	92	20	0	1	0	0	0	0	0	0	0	0	0	0	19	0	132	3	1	0	0	UN	142.4	30.36	162	59	178	119	4.45	13.6	1.02	8.5	2.7	0.05	1
1	86	21.3333	1	0	0	0	0	0	0	0	0	0	0	0	2	0	782	1	1	0	0	LAA	166.01	21.98	133	84	167	93	10.09	14.3	0.69	8.3	2.5	0.09	0
0	58	24.3333	0	1	0	0	0	1	0	0	0	0	0	0	24	1	262	1	0	4	1	CE	286.26	14.88	167	173	165	91	11.33	13.4	0.91	8.3	3.4	2.43	1
0	58	22	1	0	0	1	0	0	0	1	0	0	0	0	18	1	65	2	1	0	0	SOD	187.21	23.64	100	79	174	120	5.63	12.7	0.55	8.9	3.4	0.17	0
0	47	28.6667	1	1	0	0	0	0	1	0	0	0	0	0	0	0	410	4	0	1	1	LAA	98.65	25.16	344	688	194	78	11.4	18.7	0.93	7.8	2.6	2.8	0
1	90	18.3333	1	0	1	0	0	0	0	0	0	0	0	0	18	1	342	2	1	0	0	UN	372.09	31.68	116	102	240	178	7.26	13	0.66	8	3.6	0.12	0
0	85	20.6667	0	1	1	0	0	0	0	0	0	0	0	0	11	1	130	0	1	0	0	LAA	265.35	12.52	124	92	232	169	6.55	13	0.72	8.3	3.2	0.62	0
1	79	19.3333	1	0	0	1	0	0	0	1	0	0	0	0	20	1	79	3	1	0	0	UN	176.69	34.36	102	54	133	57	6.32	13.9	0.9	8.2	2.8	0.16	1
0	67	18.3333	1	1	1	0	0	0	0	0	0	0	0	0	2	1	168	2	1	3	1	UN	271.7	30.4	128	108	262	184	7.2	13.7	0.56	8.4	3.7	0.23	0
1	90	17.3333	1	0	0	1	0	0	0	0	0	0	0	0	11	0	122	4	1	0	0	UN	120.81	30.2	136	73	151	88	7.91	12	0.78	8	4.4	1.8	0
1	89	20	1	1	0	0	0	0	0	0	1	0	0	0	19	1	263	5	0	0	0	CE	154.88	19.6	169	86	214	152	10.88	16.5	0.95	8.4	3	2.3	1
0	54	23.3333	0	0	1	0	0	0	0	0	0	0	0	0	12	1	266	2	1	0	0	CE	81.87	25.64	111	66	244	140	10.25	15.7	0.57	8.6	3.7	0.35	0
0	88	20	1	0	0	0	0	1	0	0	0	0	0	0	8	1	254	1	1	0	0	CE	206.03	19.84	117	106	211	131	6.19	11.7	0.53	8.2	3.4	0.14	0
0	64	16.6667	1	0	0	0	0	1	0	0	1	1	0	0	6	0	652	1	1	0	0	CE	191.67	24.4	116	177	237	145	13.36	18.8	0.74	8.1	2.8	0.9	0
0	85	23.3333	1	1	1	0	0	0	0	1	0	0	0	1	22	0	270	0	1	0	0	LAA	249.35	12.52	174	74	228	168	6.33	14.6	0.55	7.6	2.9	0.43	0
1	67	23.3333	0	1	1	0	1	1	0	0	0	0	1	1	19	1	120	3	1	0	0	CE	159.01	26.44	116	90	150	70	5.11	12.6	1.09	8.7	3.8	0.05	0
1	80	20	1	0	1	0	0	1	0	0	1	1	0	1	4	1	157	3	1	0	0	CE	254.75	32.6	151	92	156	66	9.8	15.9	1.1	8.1	3	0.12	0
0	64	15	1	1	1	1	0	0	0	1	0	1	0	1	15	1	113	1	1	0	0	SOD	224.56	10.96	162	140	103	50	8.07	8.8	1.19	8.3	3.4	0.5	1
0	78	25	1	1	0	0	0	0	0	0	1	1	0	0	17	0	87	4	1	1	1	UN	213.13	13.8	201	126	119	56	8.52	12.2	0.97	8.2	3.7	0.2	1
0	74	14.3333	1	0	1	0	0	1	0	0	1	0	1	1	3	0	89	1	1	0	0	CE	207.96	31.76	169	124	119	57	8.85	14.5	0.83	8.5	3.8	1.1	0
0	86	18.6667	1	0	1	0	0	1	0	0	1	0	1	1	21	0	145	3	1	0	0	CE	256.98	23.28	115	101	188	111	9.42	11.2	0.84	7.8	3.9	0.03	1
0	89	18.6667	1	1	0	0	0	1	0	0	1	0	1	0	18	1	186	2	1	0	0	CE	166.69	35.16	119	85	134	85	4.93	9.7	1.01	7.2	3	0.8	1
0	90	28.3333	1	1	1	1	0	1	0	1	0	0	0	0	16	1	226	1	1	1	1	CE	172.09	22.88	151	56	217	121	10.08	15.3	0.95	8.7	3.2	2.43	1
1	41	32	1	0	1	0	0	0	1	0	0	0	0	0	20	1	194	2	1	1	1	SOD	179.35	27.6	108	89	257	168	7.32	14.2	0.7	8.6	3.7	0.11	0
0	94	19.6667	1	0	0	0	0	1	0	1	0	1	0	0	14	1	85	0	1	0	0	UT	99.81	11.36	125	114	147	69	10.92	9.8	0.5	8.5	3	0.64	0
1	50	28.6667	1	0	1	0	0	0	1	0	0	0	0	0	17	1	315	2	0	0	0	UT	95.33	21.92	116	145	269	118	12.57	16.8	0.65	8.1	2.8	0.5	0
1	58	20	1	0	1	0	0	1	1	0	0	0	0	1	16	1	139	2	0	0	0	CE	79.35	27.6	125	43	136	62	5.74	12.1	6.92	8.2	2.9	0.03	0
1	60	23.3333	0	1	0	1	0	0	0	1	0	0	0	0	5	0	575	2	0	4	1	UN	327.35	17.36	153	88	192	143	5.68	13	0.67	8.5	3.4	0.11	1
0	81	18.6667	0	0	0	0	0	0	0	0	0	0	0	0	8	0	430	7	0	0	0	UN	277.13	18.4	111	85	202	134	8.65	11.8	0.84	8.5	3	0.26	1
0	76	17.3333	1	1	0	1	0	0	0	1	0	0	0	0	27	1	105	1	1	0	0	CE	266.79	16.08	182	126	106	60	11.24	13.4	0.93	8.3	2.4	0.7	1
1	85	18.3333	0	1	0	1	0	0	1	0	0	0	0	0	22	1	288	2	1	4	1	LAA	247.96	13.2	160	63	212	122	10.47	15.6	0.73	8.2	2.5	1.28	1
0	94	17.3333	1	1	0	0	0	1	1	0	1	0	1	0	20	0	89	6	0	3	1	CE	256.39	12.34	128	118	182	114	5.78	7.9	0.7	8.8	3.8	0.22	1
0	82	20	0	0	0	1	0	1	0	1	0	0	0	0	3	1	134	2	1	0	0	CE	261.76	32.21	163	111	226	124	6.74	16.3	0.69	8.5	3	0.11	0
0	96	16.6667	1	1	0	1	0	1	0	0	0	1	0	0	17	1	95	1	1	0	0	CE	222.25	25.56	141	99	157	101	7.39	11.5	0.94	9.1	3	0.15	0
1	66	16.6667	0	0	0	0	0	0	0	0	0	0	0	0	19	1	132	2	1	2	1	SOD	240.41	10.68	170	131	122	54	4.23	11.1	0.64	8.4	3.2	0.3	1
1	44	25.6667	1	0	1	0	1	0	1	0	0	0	0	0	15	0	460	1	1	0	0	CE	216.38	16.96	111	155	207	161	11.46	15.8	1.03	7.4	2.8	2.32	0
1	75	15	1	0	0	0	0	1	1	0	0	0	0	0	3	0	310	2	0	0	0	CE	242.1	24.28	114	78	122	70	2.48	10	0.81	9	3.7	0.16	0
1	75	26	1	1	0	1	0	1	1	0	0	0	0	0	13	1	154	1	1	4	1	CE	247.72	15.56	297	59	204	136	9.22	16.4	0.97	8.5	3.8	0.41	1
1	94	25	1	0	0	0	0	1	0	1	0	1	0	0	20	0	93	5	1	0	0	UT	171.45	11.6	139	61	153	91	5.33	13.5	1.05	8.4	2.5	0.1	0
0	67	22.3333	1	0	1	0	0	1	0	0	1	1	0	1	14	1	102	1	1	0	0	CE	230	13.87	147	74	149	73	9.2	14.4	0.61	8.6	3.2	0.32	0
0	82	19.3333	0	1	1	0	0	1	0	0	0	0	1	1	8	0	489	2	1	0	0	CE	200.91	31.72	137	120	241	150	5.13	12.9	0.63	8.6	3.8	0.13	0
0	54	22.1333	0	0	0	1	0	1	0	1	0	0	0	0	16	0	261	4	1	0	0	CE	120.35	11.76	107	91	195	115	10.09	14.2	0.55	7	3	1.19	0
0	88	16.6667	1	1	1	1	0	0	0	1	0	1	0	1	15	1	335	3	1	0	0	LAA	102.43	32.4	109	97	193	82	10.82	13.7	0.56	8.4	2.9	0.32	1
0	64	18	1	1	1	0	0	0	0	0	0	0	1	1	11	1	154	2	1	0	0	CE	93.31	17.68	124	91	173	101	6.7	13.8	0.7	8.1	2.9	0.34	0
0	76	15	1	0	0	0	0	1	0	0	0	0	1	0	10	1	136	4	1	0	0	CE	83.32	36.16	128	42	116	54	6	11.7	0.85	8.4	3.9	0.13	0
1	72	22.3333	1	0	1	0	0	1	0	0	1	1	0	1	11	1	130	0	0	0	0	CE	119.81	21.48	144	107	189	134	9.09	12.5	1.41	8.6	2.9	0.1	0
0	80	16	1	0	0	0	0	1	0	0	1	0	1	0	13	1	321	2	1	0	0	UT	184.25	22.66	122	67	189	107	6.5	13.3	0.7	7.5	3.1	1.34	0
0	59	15	0	0	0	0	0	0	0	0	0	0	0	0	12	1	104	1	1	0	0	SOD	236.44	33.08	173	94	235	89	12.47	14.2	0.71	8.8	4.3	0.1	0
0	81	21.6667	1	1	0	0	0	1	0	0	0	1	0	0	21	1	352	4	0	4	1	CE	131.27	13.92	287	120	192	72	14.2	14.1	1.67	8.4	2.8	2.59	1
0	94	16.3333	1	0	0	0	0	0	1	0	0	0	0	0	22	0	117	2	1	0	0	CE	171.93	26.28	86	115	135	83	11.27	9.6	1.44	8.3	2.9	0.05	1
1	52	21.6667	0	0	0	0	0	0	1	0	0	0	0	0	21	1	103	1	1	0	0	SOD	280.66	29.92	125	51	197	107	12.02	14.5	0.77	8.2	3.6	0.1	0
0	81	12.6667	1	0	1	0	1	1	0	0	0	1	0	1	19	0	694	1	1	0	0	CE	112.12	12.16	113	128	132	62	5.2	11	6.18	8.5	4.2	0.37	1
1	63	26	1	1	0	1	0	1	1	1	1	0	0	0	6	1	190	4	1	1	1	UT	251.67	24.4	171	239	202	117	6.77	18.1	1	8.4	2.9	0.2	0
1	79	23	1	1	1	0	0	1	0	0	0	0	0	1	25	1	212	1	1	1	1	CE	180.66	3.12	126	134	116	64	7.38	10.2	5.25	7.8	2.6	0.4	1
1	79	20	1	0	0	1	0	0	0	1	1	0	0	0	3	0	116	1	1	1	1	LAA	166.01	21.98	104	67	198	160	6.8	15.7	0.77	8.1	2.9	0.13	0
0	80	19.3333	1	1	1	1	0	1	0	1	0	1	0	1	15	1	113	4	1	0	0	UT	74.91	19.04	104	73	112	64	6.21	8	1	7.8	4	0.06	0
1	80	27	1	0	0	1	0	1	0	1	0	0	0	0	15	1	128	4	1	1	1	UT	96.38	16.96	163	99	171	91	6.99	13.5	0.76	8.4	3.7	1.26	0
1	68	26.6667	1	0	0	0	0	1	0	0	0	0	1	0	12	1	175	5	1	4	1	CE	145.36	15.88	192	48	165	96	7.82	14.4	0.73	9	2.6	0.04	0
0	86	20	1	1	1	0	0	1	0	0	0	1	0	1	14	0	1212	11	0	0	0	CE	118.27	17.56	181	134	163	94	9.6	15.2	0.85	8.5	2.7	0.3	1
0	79	20.6667	1	0	1	1	0	1	0	1	1	1	0	1	12	1	193	1	1	2	1	CE	166.27	22.72	107	85	283	195	6.92	16.8	0.64	7.9	2.3	0.04	0
0	88	17.6667	1	1	1	1	1	0	0	1	0	1	0	1	20	1	139	0	1	1	1	LAA	236.91	22.28	169	68	132	55	6.34	10.1	2	8.5	4.8	0.03	0
1	77	19	1	1	1	0	0	1	0	0	1	0	0	0	20	1	189	1	1	0	0	CE	173.14	17.56	107	44	116	53	6.82	11.9	0.93	8.2	3.6	0.03	1
1	82	23.3333	1	1	1	1	0	1	0	0	0	1	0	1	9	1	108	1	1	0	0	CE	381.11	31.08	252	98	127	52	5.96	15.3	0.86	9.1	3.6	2.42	0
1	64	20	1	1	0	0	0	0	0	0	0	0	0	0	7	1	176	1	1	4	1	UN	138.53	16.04	107	83	126	70	10.21	16.5	1.21	8.7	3.7	2.12	1
1	74	25	1	0	1	0	0	1	0	0	1	0	1	1	21	0	560	3	1	2	1	CE	186.53	31.16	113	57	119	52	6.59	12.8	0.64	9	2.8	1.65	1
0	92	26.6667	1	1	1	0	0	1	0	0	1	0	0	1	23	0	259	3	1	3	1	CE	173.67	8.92	142	38	119	65	7.5	11.4	0.4	8.7	4.1	1.75	1
1	62	16.6667	1	1	0	0	0	0	1	0	1	0	0	0	17	1	720	3	1	0	0	SOD	175.78	13.28	130	67	188	141	17.04	13.2	0.9	7.8	4	0.49	1
1	71	19.6667	1	1	0	1	1	0	0	1	1	0	0	0	19	0	151	5	1	0	0	UT	132.49	18.24	197	61	119	66	11.9	14.1	1.08	8.4	3.8	0.32	1
1	89	24	0	1	0	0	0	1	0	0	0	0	0	0	20	1	198	1	1	0	0	CE	233.51	28.68	114	91	133	58	10.48	10.6	1.18	8.5	4.5	0.34	1
1	85	26.6667	1	0	1	0	0	0	0	0	1	1	0	1	12	0	665	0	0	0	0	CE	174.64	12.56	97	70	131	54	7.77	15.9	1.18	8.6	3.2	0.08	1
1	81	21.6667	1	0	1	1	0	1	1	0	1	0	1	1	20	0	108	1	1	2	1	CE	196.41	19.76	132	74	87	35	6.46	13.5	1.87	7	3.5	1.12	1
0	85	14.6667	1	1	0	0	0	1	0	0	1	0	1	0	18	0	88	10	0	0	0	CE	188.51	29.76	125	92	174	83	4.19	10.2	0.81	7.2	3.8	2.28	1
1	91	16.6667	1	0	1	0	0	0	0	0	1	1	0	1	8	0	615	4	1	0	0	UN	437.54	15.04	92	62	69	38	7.91	9.4	0.97	8.1	2.8	0.85	0
1	81	28.3333	1	1	1	0	0	1	0	1	1	1	0	1	20	1	179	1	1	0	0	CE	259.24	31.64	137	84	121	62.2	10.13	15.2	0.99	7.7	2.7	0.06	0
1	85	26.3333	1	1	1	0	1	1	0	0	1	0	0	1	21	0	512	2	1	0	0	CE	331.27	20.12	135	86	131	68	14.33	15.5	0.72	7.6	3.6	0.08	1
0	77	15.6667	0	1	0	1	0	1	0	1	0	1	0	0	12	0	1160	2	1	2	1	CE	251.42	21.68	233	173	183	124	5.64	13.8	0.65	8.3	3.1	0.3	0
0	63	20	1	0	0	1	0	0	0	1	0	0	0	0	10	0	821	4	0	0	0	UN	163.64	26.32	130	255	211	120	5.79	13.4	0.5	8.5	2.7	0.4	1
1	72	22.6667	1	1	0	0	0	1	0	0	0	0	1	0	15	1	120	2	1	0	0	UT	98.13	17.64	117	137	121	62	8.91	14.3	0.9	8.1	3.2	0.1	0
0	94	13.3333	1	0	1	0	0	1	0	0	1	0	1	1	20	1	153	3	1	0	0	CE	267.61	14.44	110	58	138	68	2.99	12.7	0.7	8.1	2.9	1.56	0
0	77	19.6667	0	1	1	0	0	1	0	1	1	0	1	1	16	1	70	1	1	0	0	CE	99.81	11.36	101	72	177	92	4.81	14.1	0.76	8.4	4.2	0.03	0
1	49	23.3333	0	0	0	0	0	0	0	0	0	0	0	0	7	1	105	2	1	0	0	CE	216.22	13.52	101	69	168	110	6.68	14.6	0.9	8.4	2.8	0.13	0
0	88	15.6667	1	0	0	0	0	1	0	0	0	0	0	0	17	0	547	1	0	1	1	CE	290.01	24	190	46	203	117	7.47	13.1	0.8	8	3.3	0.7	0
0	46	31.3333	0	1	0	0	0	0	0	1	0	0	0	0	15	0	204	3	1	4	1	SOD	139.65	24.76	204	263	226	120	42.17	7.1	0.75	8.5	3.8	1.5	1
1	85	16.6667	1	0	0	0	0	1	0	0	0	1	0	0	18	0	413	7	1	0	0	CE	144.67	10.12	125	102	104	71	9.15	12	1.5	7.9	2.8	0.15	1
1	83	26	1	0	1	0	0	0	0	0	0	0	0	1	1	0	755	0	1	0	0	UT	151.67	24.4	105	84	121	62	6.75	14.4	1.07	6.9	2.8	1.4	0
0	74	18.3333	1	0	1	1	0	0	0	1	0	0	0	0	2	1	365	1	1	2	1	LAA	169.21	15.68	129	64	255	165	7.1	13.9	0.61	8.1	2.6	0.47	0
1	38	31.6667	0	0	1	0	0	0	1	0	0	0	0	1	6	1	182	3	1	1	1	SOD	245.23	22.84	100	161	226	145	15.68	14.4	0.82	8.5	2.7	0.37	0
0	73	22.3333	0	1	1	0	0	0	0	1	0	0	0	0	23	1	246	2	1	4	1	LAA	197.41	24.32	130	210	161	86	9.25	13.4	0.7	7	2.6	0.14	1
1	60	24.3333	1	1	0	0	0	0	0	0	0	0	1	0	2	1	177	1	1	1	1	CE	99.31	11.36	99	140	196	128	3.43	11.9	0.89	8.3	3.5	5.53	0
1	91	28.3333	1	1	1	0	0	0	0	0	0	1	0	1	23	1	117	1	1	0	0	LAA	107.96	21.04	193	86	140	81	5.93	13.2	1.29	8.1	3.1	0.09	1
0	49	23	0	0	0	0	0	0	0	0	0	0	0	0	6	0	320	1	1	0	0	SOD	65.05	30.92	101	65	136	88	5.45	13.6	0.6	8	2.2	0.53	0
1	69	18.3333	1	0	0	1	0	1	0	0	0	0	0	0	12	1	210	1	1	0	0	CE	95.33	21.92	88	61	130	86	3.38	9.7	0.46	8.8	3.6	0.09	0
0	90	17.6667	0	1	0	0	0	1	0	0	0	0	0	0	16	1	117	2	1	1	1	CE	164.52	14.52	116	77	200	130	4.72	12.2	0.9	8	2.6	0.37	1
1	82	20.6667	1	0	0	1	0	1	0	0	0	0	1	0	6	1	160	1	1	0	0	CE	51.67	24.4	119	67	133	74	5.1	11.1	1.11	8.1	2.5	1.76	0
1	69	19	0	1	1	0	0	0	1	0	0	0	0	0	14	0	426	4	1	2	1	UN	113.07	13.78	152	79	249	163	20.77	15.6	0.77	9.2	3.5	1.8	0
1	50	20.3333	0	0	1	0	0	0	1	0	1	1	0	1	10	0	543	2	1	4	1	UN	265.12	32.12	94	98	128	58	6.83	11.3	1.24	8.4	2.9	0.17	0
0	86	16.6667	1	1	0	0	0	1	0	1	0	1	0	0	23	1	77	1	1	0	0	CE	144.21	23.64	89	97	183	118	9.18	13.1	1	8	3	0.33	0
0	73	18.3333	1	1	1	1	0	0	0	0	0	0	0	1	6	1	245	1	1	0	0	UT	91.31	17.68	104	140	138	57	10.15	13.9	0.61	8.4	3.1	0.5	0
1	73	25	0	0	0	1	0	0	0	0	1	1	1	0	5	0	256	1	1	0	0	CE	216.22	13.52	105	37	144	91	4.3	13.3	0.95	8	2.9	2.38	0
0	76	19.3333	1	1	1	0	0	0	0	0	0	1	0	1	11	1	156	1	1	2	1	CE	251.7	22.44	187	109	112	42	4.39	12	0.7	8.5	3.4	0.16	1
0	64	19.6667	1	1	1	0	0	0	0	0	0	0	1	0	15	0	415	1	1	0	0	CE	380.33	13.42	150	112	236	180	7.08	13.1	0.7	7.8	3	0.14	0
1	101	21.6667	1	1	1	1	1	1	0	1	0	0	1	1	10	0	130	1	1	0	0	CE	126.75	34.28	186	115	188	118	5.88	13.7	1	8.5	3.2	0.18	1
0	86	13	1	0	1	0	0	0	0	0	0	0	0	0	7	1	296	1	1	0	0	LAA	251.15	27.72	129	92	242	163	8.01	12.1	0.69	8.4	3.1	0.17	0
1	73	21.6667	1	0	0	1	0	1	0	0	0	0	0	0	7	0	750	4	1	0	0	UT	372.45	11.6	129	98	160	77	3.26	13	0.86	8.2	2.8	0.3	0
0	76	26.6667	1	1	0	0	0	1	0	0	0	0	0	0	11	1	183	2	1	2	1	CE	278.35	12.52	133	115	150	77	8.11	13.5	0.75	8.4	3.7	0.15	0
0	89	18.3333	1	1	1	0	0	1	0	0	1	0	0	1	24	0	143	2	1	2	1	CE	264.38	13.04	130	81	205	117	9.09	14.5	0.63	7.9	2.2	0.92	1
1	87	24.3333	1	0	0	0	0	1	0	0	0	1	0	0	16	0	530	3	0	0	0	CE	297.98	21.08	119	289	153	57	9.18	15.8	1.17	7.8	3	0.14	1
0	93	19	1	1	0	1	0	0	0	0	0	1	0	0	22	0	496	5	0	2	1	LAA	255.67	14.72	137	111	227	146	1.43	13.7	0.62	8.5	3.1	8	1
1	76	22.6667	1	1	0	1	0	0	0	0	1	1	0	0	10	1	340	1	1	0	0	UN	281.32	36.16	87	88	164	109	6.46	12.5	1.2	8.1	2.7	0.53	0
0	62	14	1	0	1	1	0	1	0	1	0	1	0	0	21	1	130	2	1	2	1	CE	146.48	19.66	99	71	149	65	9.06	12.2	1.03	7.9	4.3	0.03	0
1	60	23.3333	0	0	0	0	0	0	0	0	1	0	0	0	15	0	134	6	1	0	0	CE	490.26	16.24	100	96	146	119	9.17	11.9	0.8	8.6	4.7	0.1	1
1	61	21.6667	1	1	1	1	0	1	0	1	0	1	0	1	11	0	299	3	1	2	1	CE	146.71	22.28	370	207	262	170	9.61	16	1.5	7.4	2.8	1.1	0
0	83	19.3333	1	0	1	1	0	1	0	0	1	1	0	1	2	0	359	1	1	0	0	CE	51.67	26.4	111	119	124	63	4	12.8	0.59	8.5	4.1	0.04	0
1	69	21.3333	1	0	1	1	0	0	1	1	0	1	0	1	16	0	248	2	1	2	1	CE	276.32	36.16	114	129	149	93	1.907	9.6	0.85	8	3.4	0.6	0
0	59	17.3333	0	0	0	0	0	1	0	0	0	1	0	0	7	0	479	3	1	0	0	CE	151.67	18.28	92	52	190	12	47.4	13.7	0.68	8.5	3.7	0.32	0
1	69	24	1	1	1	0	0	1	0	0	1	0	1	1	10	0	455	1	1	0	0	CE	271.45	15.42	123	116	115	65	5.32	13.6	1	8.3	2.7	1.53	0
0	77	17.3333	1	0	1	1	1	1	0	1	1	1	1	1	9	0	142	1	0	0	0	CE	187.68	21	153	182	106	48	6.01	10.7	0.6	8.2	3.2	0.1	1
1	35	26	1	0	0	0	0	0	0	0	0	0	0	0	6	1	201	2	1	0	0	LAA	96.31	17.68	97	52	124	68	8.15	15.5	0.79	7.8	3	0.09	0
1	62	22	0	0	0	1	0	0	1	1	0	0	0	0	15	1	134	2	1	0	0	LAA	307.96	12.2	176	119	153	100	9.19	19.2	0.72	8.4	3	0.3	1
1	83	19.6667	1	1	0	0	0	0	1	0	0	0	0	0	23	1	166	4	1	3	1	SOD	254.48	25.12	316	121	93	38	7.95	8.8	0.94	8	2.5	2.68	1
1	75	19.3333	1	1	0	0	0	0	0	0	0	0	0	0	28	0	125	3	1	0	0	LAA	336.85	16.88	130	57	185	107	5.49	14.1	0.76	8.2	2.2	0.14	1
1	62	28	0	0	0	1	0	0	1	0	1	0	0	0	5	1	247	4	1	0	0	LAA	234.57	8.6	130	40	206	146	8.24	14.6	0.57	8.1	3.2	0.08	0
1	67	27	1	1	0	1	0	1	1	1	0	1	0	0	18	1	136	4	1	4	1	CE	243.24	23.96	100	269	222	140	8.21	16.4	1.04	8.3	3.1	3.12	1
0	84	17	1	0	0	1	0	0	0	0	0	0	0	0	13	0	570	1	1	0	0	UT	56.4	26.88	127	69	207	140	6.22	12.3	0.66	7.5	2.2	1.2	0
1	84	26	0	1	0	0	0	0	1	0	0	0	0	0	20	1	124	5	1	3	1	CE	245.42	18.12	150	111	205	145	9.22	16.8	0.96	9.5	3.6	0.19	1
1	71	14.6667	0	1	0	0	0	1	0	0	1	0	0	0	12	0	298	4	1	1	1	CE	277.62	10.56	102	84	144	83	9.94	14.7	0.77	9.2	3.4	0.07	1
0	81	18	1	0	1	1	0	1	0	1	1	0	1	1	20	0	501	2	1	3	1	CE	243.91	30.16	130	62	137	43	6.63	10.9	1.1	8.1	2.7	1.27	1
0	74	18.3333	1	1	1	1	0	1	0	0	1	1	1	1	15	0	520	1	1	0	0	CE	145.23	22.84	137	100	186	107	11.67	14.3	1.02	8.3	3.4	0.16	0
1	75	24	1	0	1	0	0	1	0	0	1	0	1	1	22	0	485	1	1	1	1	CE	98.65	25.16	99	67	96	42	6.38	15.4	0.8	8.9	3	0.19	0
1	66	24.3333	1	1	0	0	0	0	0	0	0	0	0	0	15	0	432	1	1	3	1	LAA	289.55	11.6	116	79	212	142	5.89	15	0.99	9.3	4.2	0.11	0
1	87	20.6667	1	0	1	1	0	1	0	0	0	1	0	1	12	0	555	1	1	0	0	CE	210.45	13.56	102	69	129	84	8.04	16	1.11	8.6	3.3	0.44	0
1	55	26	1	0	0	0	0	0	0	0	0	1	1	0	16	1	75	1	1	0	0	CE	81.87	25.64	120	166	180	112	9.69	12.6	0.7	8.1	3.2	0.5	0
1	62	27	1	1	0	0	0	1	0	0	0	1	0	0	4	1	677	4	1	0	0	CE	63.77	29.21	152	158	207	143	6.35	15.6	1.2	8	3.6	0.14	0
0	68	16	1	1	0	0	0	0	0	0	0	0	0	0	22	0	56	5	1	0	0	UN	191.48	18.2	148	120	68	29	22.63	12.3	1.1	8	3.5	2.4	1
1	67	20.6333	1	0	1	0	0	1	0	0	1	0	1	1	17	0	174	1	1	0	0	CE	281.87	25.64	114	173	159	93	11.63	11.5	2.21	8.4	2.5	1.2	0
0	79	19.3333	0	1	0	0	0	0	0	0	0	0	0	0	23	0	434	6	0	0	0	SOD	191.12	32.6	140	115	192	148	10.13	8.5	0.37	8.6	3.7	0.27	1
0	73	20.6667	1	0	0	0	0	1	0	0	0	0	0	0	21	0	739	3	1	0	0	CE	247	24.72	152	83	212	119	7.1	15	0.6	7.6	3.5	0.35	0
1	74	16	0	0	1	0	0	0	0	0	1	0	1	0	19	0	190	4	1	0	0	UT	83.32	36.16	114	69	226	164	6.22	13.6	0.8	7.9	3.4	0.14	0
1	62	20.6667	1	1	0	1	0	1	1	1	0	0	0	0	15	1	166	1	1	1	1	CE	281.87	26.64	157	106	207	115	12.34	13.8	0.81	8.5	3.2	0.07	0
1	78	25.3333	1	0	0	1	0	0	0	1	0	0	0	0	9	0	133	5	1	0	0	CE	236.44	33.08	89	58	150	97	4.94	13.4	0.7	8.7	3.6	0.06	0
0	53	15.6667	0	0	0	0	0	0	0	0	0	0	0	0	14	0	350	1	1	0	0	CE	245.23	22.84	101	64	173	113	6.53	14.7	0.56	7.4	2.8	0.11	0
0	70	16	1	1	0	1	0	1	0	1	0	0	1	0	5	1	203	1	1	0	0	CE	229.89	13.87	129	55	166	91	7.75	11.6	0.68	8.3	2.4	0.09	0
1	88	24	1	1	1	0	0	0	0	0	0	1	0	1	13	0	120	1	1	1	1	LAA	95.33	21.92	207	98	158	87	7.49	15.2	0.9	8	2.3	0.31	0
0	62	18.3333	1	0	0	0	0	1	0	0	0	1	0	0	21	1	102	4	1	0	0	CE	81.87	25.64	97	82	181	95	5.89	13.1	0.6	8.7	3.8	0.33	0
0	51	23.3333	1	0	1	0	0	0	1	1	0	0	0	1	4	0	343	1	1	0	0	SOD	29.89	13.87	107	115	169	117	10.67	17.5	0.86	7.7	2.4	0.14	0
0	83	19	0	0	0	0	0	0	1	0	0	1	0	0	18	0	1090	3	0	2	1	UN	240.27	22.64	134	113	188	130	14.28	16.5	0.7	8.4	3.1	0.14	1
0	86	12.3333	1	0	0	0	0	0	0	0	0	0	0	0	18	1	203	3	1	0	0	UT	244.46	10.92	162	76	175	107	11.23	12.3	0.72	8	4	1.42	1
1	79	20	1	0	0	1	0	1	1	0	1	1	0	0	15	1	120	1	1	0	0	UT	99.81	11.36	167	89	160	99	6.74	13.6	1	9.4	4.4	1.68	0
1	89	26.6667	1	1	0	0	0	1	0	0	0	1	0	0	19	0	196	3	0	2	1	CE	255.3	13.08	131	121	213	139	10.56	16	1.01	8.5	2.8	1.1	1
1	56	20	0	0	0	0	0	0	1	1	0	0	0	0	12	1	179	1	1	0	0	UN	129.89	13.87	118	92	135	42	6.78	12.5	0.7	8.7	3.6	0.34	0
1	82	26	1	1	1	0	0	0	0	0	1	1	0	1	15	1	301	1	1	3	1	UT	265.68	16.64	261	78	125	72	8.48	12	1.02	7.8	2.5	0.24	1
0	94	31.6667	1	1	1	1	0	1	0	1	0	1	0	1	15	0	227	1	1	2	1	CE	223.28	34.48	181	137	172	103	6.99	12.8	0.6	7.8	3	0.65	0
1	92	21.6667	1	0	1	1	0	1	0	1	0	1	0	1	16	0	681	3	1	0	0	CE	256.4	26.88	104	37	95	51	8.35	12.1	1.02	8.2	0.7	0.08	0
0	86	19	1	1	1	1	0	1	0	1	0	0	0	1	13	1	209	4	1	1	1	CE	163.79	16.92	113	87	185	104	5.32	11.6	0.9	8.4	2.9	0.2	0
1	80	24	1	0	1	0	0	1	0	0	1	1	0	1	18	1	125	2	1	0	0	CE	271.45	11.6	151	144	171	83	7.99	15.6	0.9	8.2	2.2	0.6	0
0	87	21.3333	1	0	0	1	0	1	0	1	0	0	0	0	11	0	148	1	1	0	0	CE	198.45	17.4	137	59	170	96	5.06	12.4	0.57	8	3.1	7.46	1
0	85	12.6667	1	1	1	0	0	1	0	1	0	0	1	1	24	0	201	3	1	0	0	CE	168.12	14.32	100	77	106	57	5.55	11.2	0.82	7.9	3.1	0.07	0
0	93	13.3333	1	1	0	0	1	1	0	0	0	0	1	0	10	0	643	5	0	0	0	CE	248.61	31.12	108	214	146	77	3.34	12.8	0.9	8	2.5	0.6	0
1	31	19.3333	0	1	0	0	0	0	0	0	0	0	0	0	13	0	110	3	0	0	0	UN	178.8	16.72	119	267	158	86	9.76	7.8	0.6	8	3.1	0.13	1
1	94	19.6667	1	0	0	0	0	1	0	0	0	1	0	0	5	0	525	1	1	0	0	CE	126.38	16.96	118	162	157	101	6.05	14.7	0.82	8.5	3.8	0.2	0
0	79	22.6667	1	1	1	1	0	0	0	0	1	1	0	1	9	0	68	0	1	0	0	LAA	101.15	12.16	234	134	120	72	8.4	8.9	1.89	8.5	3.8	0.5	0
0	78	18.6667	1	1	1	0	0	0	0	0	0	1	0	0	12	1	221	8	0	1	1	LAA	134.12	35.72	149	40	121	68	9	11.8	0.7	8.2	2.9	0.15	1
0	84	19.3333	1	1	1	0	0	1	0	1	1	0	1	1	11	0	190	1	1	0	0	CE	198.65	25.16	112	119	109	66	10.63	11.3	0.71	8.1	2.9	0.12	0
0	68	23.3333	1	1	0	0	0	1	0	0	0	0	0	0	20	1	128	1	1	4	1	UT	247.9	28	109	72	131	85	7.65	14.6	0.7	8.1	2.7	0.06	0
0	72	18	1	1	0	1	0	1	0	1	1	0	1	0	5	0	210	4	1	3	1	UT	118.78	14.68	332	122	169	121	7.24	14.9	0.6	9.2	3.1	0.05	0
0	80	17.6667	1	0	0	1	1	0	0	1	0	1	0	0	18	1	163	1	1	2	1	LAA	204.81	26.52	133	206	191	122	12.66	12.1	1.06	8.1	2.6	5.53	0
0	93	15.6667	1	1	1	1	0	1	0	1	0	1	0	1	7	0	758	2	1	3	1	CE	242.51	31.04	107	63	116	73	5.83	11.4	1	8.2	3.8	0.04	1
0	77	18.6667	1	0	1	0	0	0	0	0	1	1	0	1	15	0	1185	3	1	0	0	LAA	165.05	22.81	106	86	165	89	6.87	14.3	0.8	8.1	2.6	0.13	0
1	67	21.6667	1	0	0	1	0	0	1	0	0	0	0	0	19	0	140	1	1	0	0	LAA	286.91	22.28	108	119	151	106	11.77	16	0.9	8.1	2.6	1.54	0
0	90	19.3333	1	0	1	0	0	0	0	0	0	0	0	1	14	0	379	1	1	0	0	LAA	176.41	14.72	104	127	140	72	6.74	13.5	1.31	8.5	2.9	0.9	1
0	97	12.6667	1	1	0	0	0	0	0	0	0	0	0	0	13	0	120	0	1	3	1	UN	158.78	22.04	148	91	162	80	7.41	15.1	1.8	8.7	3.5	0.28	0
0	67	17.6667	1	1	1	1	0	1	0	0	1	0	0	1	14	0	150	3	1	0	0	UT	315.67	24.52	121	86	153	73	11.22	14	1	8.2	3.6	0.09	0
1	50	27	1	1	1	0	0	0	1	0	1	0	0	0	32	1	168	2	1	0	0	LAA	129.11	14.04	208	173	286	198	17.36	14.8	1.19	8	3.8	0.3	1
1	84	23.3333	1	1	1	1	0	0	0	1	0	0	0	0	10	0	327	3	1	3	1	UT	108.92	13.04	148	97	170	91	5.44	15.9	0.91	8.3	2.9	0.17	0
1	80	19	1	1	0	0	0	0	0	0	0	0	0	0	12	0	218	0	1	0	0	CE	167.61	14.44	130	76	209	107	11.97	15.5	0.9	7.7	3.2	0.08	0
1	79	21.6667	1	1	0	0	0	0	0	0	0	1	0	0	8	1	691	1	1	0	0	CE	166.01	13.08	108	60	230	124	7.78	13.6	0.9	7.8	3	1.19	0
1	92	20	0	0	0	0	0	1	0	0	0	0	0	0	4	0	294	3	1	1	1	CE	146.38	16.96	151	81	184	103	4.45	12.8	0.69	8.3	3.4	0.13	0
1	74	20	1	1	1	0	0	1	0	0	0	1	0	1	8	0	127	1	1	4	1	UT	248.4	23.76	111	64	94	38	7.22	14.9	0.7	7.8	3	1.29	1
1	91	21.3333	0	0	1	0	0	0	0	0	1	1	0	1	17	0	94	2	1	0	0	UN	188.23	16.16	95	53	137	64	4.89	15	0.56	7.8	2.4	0.66	0
1	72	26.6667	1	1	1	0	0	1	1	0	0	0	0	1	13	1	135	3	1	3	1	CE	224.48	21.54	200	175	146	77	6.79	14	0.92	8.2	2.7	3.11	1
1	44	19	0	0	0	0	0	0	0	0	0	0	0	0	7	1	188	6	0	0	0	CE	102.52	13.16	104	96	138	84	6.75	16.3	1	8.5	3.3	0.04	0
0	74	16	1	1	0	0	0	1	0	1	0	1	0	0	20	1	147	3	1	0	0	CE	293.31	17.68	73	114	157	83	8.66	11.7	1.03	8.9	3.2	0.04	0
1	86	17.3333	0	0	0	1	1	0	0	0	0	0	0	0	11	0	122	1	1	0	0	UT	98.65	25.16	128	186	137	87	9.45	10.5	0.9	8.2	2.5	1.35	0
0	70	17.6667	1	1	0	0	0	0	0	0	0	0	0	0	19	1	168	1	1	0	0	LAA	151	24.36	163	147	165	94	7.83	14.8	0.79	8.2	3.2	1.3	1
1	83	22.6667	1	1	1	0	0	0	0	0	1	1	0	1	19	1	159	11	1	4	1	LAA	215.69	23.96	152	41	78	35	5.75	14.3	0.8	8.9	3.6	0.07	0
0	34	18.3333	0	0	0	0	0	0	0	0	0	0	0	0	18	1	120	2	1	0	0	SOD	188.08	16.6	101	66	179	114	5.3	12.5	0.5	8.5	2.5	0.08	0
0	65	16.6667	0	0	0	0	0	0	0	0	0	0	0	0	14	0	419	4	1	2	1	CE	212.87	22.78	127	88	175	110	5.86	12.7	0.4	8.5	3.2	0.5	0
1	81	23.3333	1	1	0	0	0	0	1	0	0	0	0	0	8	1	305	1	1	0	0	UT	286.22	13.52	133	123	217	141	7.14	17.1	1.19	8.6	2.7	0.2	0
1	82	21.3667	1	0	0	1	0	1	0	1	1	1	1	0	15	0	372	4	1	2	1	CE	280.66	13.92	115	91	181	124	12.46	13.7	0.71	8.1	3	0.74	1
0	77	19.3333	1	1	1	0	0	0	0	0	1	1	0	1	14	0	202	1	1	0	0	LAA	223.74	18.56	159	67	104	49	14.9	14.1	0.6	8.4	3.2	0.24	1
1	80	24	0	0	0	1	0	0	0	0	0	0	0	0	9	0	357	0	1	0	0	LAA	174.64	26.36	109	126	183	122	14.61	15.8	1.03	8	3.6	0.3	0
1	53	22.6667	1	1	1	0	0	0	1	0	0	0	0	0	7	0	367	0	1	0	0	UT	98.65	25.16	335	299	293	192	4.82	15.9	0.8	8.8	3.3	0.6	0
0	69	15.6667	1	1	1	0	0	1	0	0	0	1	0	0	13	1	128	2	1	1	1	CE	256.44	33.08	156	157	154	81	10.96	14.4	0.7	8.6	2.5	0.21	0
1	86	26	1	0	0	0	0	1	0	1	0	1	0	0	8	0	615	5	1	3	1	CE	213.18	18.52	143	56	145	88	7.96	12.6	0.82	8.3	2.9	1.55	1
1	71	19.3333	1	0	0	0	0	1	0	0	0	1	0	0	5	1	248	1	1	0	0	CE	267.61	14.44	105	93	136	65	10.39	14.1	1.1	8.3	2.1	0.1	0
0	78	17	1	1	1	0	0	1	0	0	0	0	1	0	14	1	173	4	0	1	1	CE	239.59	22.78	85	74	153	91	8.45	12.3	0.6	7.9	2.3	0.19	0
1	67	23.6667	1	0	0	0	0	0	0	0	1	0	0	0	10	0	82	2	1	1	1	UT	165.05	30.92	104	170	172	94	10.4	13.7	0.89	8	3.3	0.4	0
1	72	20	1	0	1	0	0	0	0	1	0	1	0	1	11	0	331	3	1	0	0	UT	141.21	23.64	114	138	167	70	12.57	15.5	0.72	8.8	3.3	1.45	0
0	94	20	1	0	1	0	1	1	0	0	1	0	1	1	13	0	92	1	1	1	1	CE	169.73	25.48	178	68	154	78	6.96	11.2	0.81	8.7	3.9	0.36	0
1	83	21.6667	1	1	1	1	0	1	1	1	1	0	0	0	19	1	220	0	1	0	0	UT	141.91	17.96	150	155	112	61	8.59	15.1	0.9	7.8	3	0.13	1
0	95	13.3	1	1	1	0	0	0	0	0	0	0	0	0	27	0	302	2	1	1	1	CE	258.78	14.36	127	149	170	103	10.11	11.9	0.7	8.2	3.8	0.6	1
0	51	16	0	1	0	0	0	0	0	0	0	0	0	0	8	1	305	1	1	2	1	UN	131.27	11.8	120	131	159	105	8.38	9.2	0.5	8.1	3.2	1.8	0
1	87	23.3333	1	1	1	1	0	1	0	1	1	1	0	1	15	0	205	7	1	1	1	UT	81.81	18.6	120	45	87	38	9.24	14.4	1	8	2.8	2.71	0
1	80	18.7333	1	1	1	0	1	1	0	0	0	0	0	0	28	0	119	10	0	1	1	CE	241.24	25.84	182	162	186	129	11.59	15.5	1.1	8	3.1	0.1	1
0	79	13	1	0	0	0	1	1	0	0	0	1	0	0	16	0	439	1	1	0	0	CE	144.24	21.56	139	58	101	28	8.82	12.4	0.43	8.4	3.2	0.07	1
0	80	13.6667	0	1	0	0	1	1	0	0	0	0	1	0	14	0	221	2	1	1	1	CE	205.54	13.24	198	98	170	116	6.05	10.7	0.9	8.2	2.6	0.1	0
1	48	22.6667	1	0	0	0	0	0	1	0	0	0	0	0	9	0	415	3	1	0	0	UT	365.05	30.92	104	162	187	114	9.31	14	0.81	8.3	3.1	1.3	0
1	81	20.6333	1	0	1	0	0	0	0	0	1	1	0	1	19	0	204	0	0	0	0	LAA	179.53	17.24	112	50	124	59	5.28	12.1	0.7	8.1	2.9	0.1	1
0	96	15	0	1	1	0	0	0	0	1	0	0	0	1	11	0	895	1	1	2	1	LAA	117.96	11.16	226	74	133	67	7.15	11.5	0.6	8.4	2.9	0.04	1
0	83	25	1	0	1	0	0	1	0	0	0	1	0	1	14	1	145	2	1	0	0	CE	187.61	14.44	149	155	138	75	6.54	13.2	1.13	7	2.6	0.53	0
0	96	18	1	1	1	1	1	1	0	1	0	1	0	1	14	0	75	2	1	2	1	LAA	159.55	20.6	131	61	66	24	9.04	12.8	1.09	8.2	2.2	0.11	0
0	70	17.3333	0	1	0	1	0	1	0	1	1	0	1	0	32	0	160	1	1	1	1	CE	189.41	30.08	123	319	127	75	14.3	13.2	0.66	8.3	3.4	0.16	1
1	61	28.3333	0	0	0	0	0	0	0	0	0	0	0	0	16	1	220	1	1	0	0	UN	167.94	21.52	107	93	197	120	8.54	14.6	0.7	8.8	2.9	0.1	1
1	82	25.3333	1	1	1	1	0	1	0	1	0	1	0	1	28	0	865	1	1	0	0	CE	245	32.24	142	135	130	70	8.33	12.6	1.2	8	3.3	0.1	1
1	87	20.3333	0	1	0	0	0	1	0	0	0	0	0	0	28	0	553	2	1	0	0	CE	112.2	16.52	327	220	94	26	16.49	16.2	1.63	8.1	2.9	0.16	1
0	94	16.6667	1	1	0	0	1	1	0	0	0	0	0	0	7	0	992	2	1	0	0	CE	283.32	36.16	122	108	165	109	9.51	14.8	0.7	8.6	3.3	0.17	0
1	96	26.6667	0	1	0	0	0	1	0	0	0	0	0	0	21	0	163	1	1	0	0	CE	127.96	20.2	117	97	122	80	10.5	15	0.9	7	3	0.08	1
1	95	26	1	1	1	0	0	1	0	0	0	1	0	1	16	0	201	1	1	2	1	CE	124.56	8.28	149	62	130	68	10.03	15.9	1	8.2	3.2	1.08	1
0	68	20.6667	1	1	0	1	0	1	0	0	1	1	0	0	21	1	202	1	1	0	0	CE	279.02	18.8	125	81	186	108	4.72	14.7	0.91	8.1	3.4	0.1	0
0	79	26.6667	1	1	1	0	0	0	0	0	1	1	0	1	22	0	640	2	0	1	1	LAA	207.16	17.72	141	103	110	45	8.89	15.3	0.7	8.3	3.1	0.29	1
0	68	24.3333	0	0	0	0	0	1	0	0	0	0	0	0	21	1	155	1	1	0	0	CE	139.62	29.32	97	157	168	104	5.73	13.9	0.85	8.1	3.5	0.03	0
1	82	19.6667	1	0	0	0	0	1	0	0	0	1	0	0	18	0	349	1	1	3	1	CE	278.61	9.52	133	58	120	75	5	12.1	0.8	8.1	3	1.14	1
1	59	28.2333	1	0	1	0	0	0	1	0	0	0	0	0	9	0	1016	2	0	0	0	LAA	217.51	19.16	220	86	230	144	11.98	13.1	1.01	8.8	3.4	1.67	1
0	83	17.3333	1	1	1	1	0	0	0	1	0	1	0	1	21	1	223	2	1	3	1	SOD	256.11	14.84	121	78	160	93	9.34	12.5	0.75	8.1	3.3	0.07	1
0	88	16.3333	1	1	0	0	1	1	0	0	0	1	0	0	18	0	175	1	1	0	0	UT	269.11	19.73	86	87	186	123	9.45	9	0.64	7.8	2.4	0.34	0
0	67	17.6667	1	0	1	1	0	1	0	1	1	0	1	1	20	1	224	3	1	2	1	CE	126.4	25.2	98	54	130	66	5.97	13	0.91	8.9	3.5	0.08	0
1	86	25.8667	1	1	1	0	0	0	1	0	1	1	0	1	4	0	98	0	0	0	0	LAA	354.27	11	122	195	161	78	11.34	15.6	1.06	8.2	3.8	2.32	1
1	51	32	1	1	1	1	1	0	1	1	0	1	0	1	11	0	614	1	1	2	1	UT	262.36	18.04	244	395	222	88	9.75	15.9	0.8	7.8	3.8	0.1	1
1	70	22	1	1	1	1	0	0	1	0	0	1	0	1	16	0	639	4	1	0	0	UT	76.89	13.87	167	150	110	61	8.8	15.5	0.95	8	3	0.3	0
0	81	18.2667	1	1	0	0	0	0	0	0	1	1	0	0	17	0	168	7	1	0	0	SOD	271.93	21.21	102	115	108	50	3.79	8.8	0.64	8.7	3.8	0.18	1
0	89	20	0	0	0	1	0	0	1	0	0	0	0	0	15	0	130	1	1	2	1	LAA	279.56	15.28	99	169	202	120	8.59	9.9	0.7	7.8	3	2.2	1
0	90	15.6667	1	1	1	1	0	0	0	1	0	1	0	0	20	0	160	3	1	0	0	LAA	217.99	18.62	106	104	140	75	6.73	13.6	0.54	9.2	7.1	11.49	1
0	86	25	1	0	0	0	0	0	0	0	0	0	0	0	14	0	300	2	0	0	0	UT	93.15	24.84	125	134	211	111	9.82	11.6	0.9	8	3.1	3.4	1
0	44	15	0	0	0	0	0	0	0	0	0	0	0	0	7	0	178	2	1	0	0	CE	299.46	15.56	105	102	177	99	10.14	10	0.53	8.2	2.7	36	1
1	62	21	0	0	1	0	0	1	0	0	0	0	0	0	8	0	253	3	1	0	0	CE	236.91	22.28	80	368	282	116	10.9	14.5	0.7	8.4	2.5	2.8	0
1	73	23.3333	0	0	0	0	0	1	1	0	0	0	0	0	13	1	245	1	0	1	1	CE	117.41	20.62	116	84	159	82	13.56	16	0.8	8	1.9	2.1	0
0	77	16.6667	0	1	1	0	0	0	0	0	0	0	0	1	13	0	680	1	1	1	1	CE	205.85	22.16	113	35	161	84	6.78	11.3	0.83	6.9	2.9	0.28	0
1	58	20.6667	0	0	0	1	0	1	0	1	0	1	0	0	14	0	515	2	1	2	1	CE	331.27	20.76	99	58	143	93	4.68	14.9	0.6	8.4	2.7	0.08	0
0	84	17.3333	1	1	1	0	0	1	0	0	1	0	0	0	19	0	263	2	1	2	1	CE	252.09	15.48	217	88	129	85	6.22	12	0.8	9	3.9	0.45	1
0	91	17.3333	1	0	1	0	1	1	0	0	1	0	0	0	18	0	110	4	1	0	0	CE	186.46	16	111	138	149	132	11.4	12.4	0.8	8.1	2.8	0.65	1
1	77	22.7	1	0	1	1	0	1	0	1	1	0	1	0	20	1	185	1	1	2	1	CE	187.46	15.72	182	118	117	78	5.36	12.6	1	8.6	2.9	0.09	1
1	78	22	1	1	1	1	1	1	1	1	1	0	1	1	19	0	163	1	1	2	1	CE	259.53	15.96	228	57	124	60	6.81	12	0.8	7.8	3.5	0.05	0
0	87	16	1	1	0	0	1	1	0	0	1	0	1	0	19	0	817	2	0	0	0	CE	165.05	15.56	89	94	164	72	8.39	11.7	1.18	8.2	3.3	2.21	1
0	77	22	1	1	1	0	0	1	0	0	0	0	1	0	10	1	196	3	1	1	1	CE	179.35	27.6	160	110	229	160	12.56	15.9	0.72	7.3	3.9	1.2	0
0	67	21.3	1	1	0	1	1	1	1	1	1	0	1	0	16	0	187	2	0	0	0	CE	187.61	14.76	127	214	234	124	10.14	12.4	1.03	8.4	3.8	3.13	1
