# Supplementary material for: The association of plasma osteoprotegerin levels and functional outcomes post endovascular thrombectomy in acute ischemic stroke patients: a retrospective observational study
Source: PeerJ. 2022 May 3;10:e13327. doi: 10.7717/peerj.13327 (PMC9074858; doi:10.7717/peerj.13327)
Supplement: Supplemental Information 8 [file peerj-10-13327-s008.xlsx]

## Sheet: Codebook
Variable name	Value	Value label
Sex	0	female
	1	male
HTN	0	No
	1	Yes
DM	0	No
	1	Yes
hichol	0	No
	1	Yes
coronary	0	No
	1	Yes
CHF	0	No
	1	Yes
Afib	0	No
	1	Yes
Smoking	0	No
	1	Yes
Alcohol	0	No
	1	Yes
Prestroke	0	No
	1	Yes
Pre_antiplt	0	No
	1	Yes
Pre_anticog	0	No
	1	Yes
Pre_statin	0	No
	1	Yes
tPA	0	No
	1	Yes
Recon_good	0	Bad_0_2a
	1	good_2b_3
HT_type	0	No
	1	HI1
	2	HI2
	3	PH1
	4	PH2
anyhemorrhagictransformation	0	No
	1	Yes
mrsdichoto	0	<=2
	1	>2
